# Supplementary material for: Unified meso-pores and dense Cu2+ sites in porous coordination polymers for highly efficient gas storage and separation
Source: Royal Society of Chemistry journal article supplement (doi:10.1039/c8dt00512e), 2018-01-01
Supplement: c8dt00512e1.pdf [file c8dt00512e1.pdf]

## **Supporting Information**

### **Unified mesopore and dense Cu<sup>2+</sup> site in porous coordination polymers for high efficient gas storage and separation**

Hongliang Lyu<sup>a</sup>, Qiang Zhang<sup>a</sup>, Yang Wang<sup>a</sup>, Jingui Duan<sup>a\*</sup>

State Key Laboratory of Materials-Oriented Chemical Engineering, College of Chemical Engineering, Nanjing

Tech University, Nanjing 210009, China.

## General Procedures and Materials

All the reagents and solvents were commercially available and used as received. Powder synchrotron X-ray diffraction patterns were collected at SPring-8 BL02B2 beamline. Simulated powder patterns from single-crystal X-ray diffraction data were generated using Mercury 1.4.2 software. For *in-situ* infrared spectroscopy, the samples were evacuated at 333 K for 6 h, and final activation was performed under a high vacuum by heating to 393 K for another 12h. IR was collected using a Thermo Scientific Nicolet 6700 FTIR spectrometer equipped with a cryogenic detector with the sample compartment modified to accommodate the cryogenic head. The final spectra were recorded at the resolution of 0.125 cm<sup>-1</sup>.

## PCP synthesis

PCP-31 and PCP-32 were synthesized according to our previous work. Synthesis of PCP-31: copper(II) nitrate (25 mg), H<sub>3</sub>L, 10 mg) and HNO<sub>3</sub> (80 μL) were mixed with 3 mL of DMF/1,4-dioxane/H<sub>2</sub>O(4:1:1) in a 4 mL glass container and tightly capped with a Teflon vial and heated at 50°C for two days. After cooling to room temperature, the vials were heated at 60 °C for another two days and then decrease the temperature to room temperature. The resulting high yield green polyhedral crystals were harvested and washed with DMF. Synthesis of PCP-32: copper(II) nitrate (13 mg), H<sub>3</sub>L, 6 mg) and HNO<sub>3</sub> (20 μL) were mixed with 1 mL of DMF/1,4-dioxane/H<sub>2</sub>O (4:2:0.5) in a 4 mL glass container and tightly capped with a Teflon vial and heated at 65°C for two days. After cooling to room temperature, the resulting high yield green crystals were harvested and washed with DMF.

## Adsorption experiments

Before the measurement, the solvent-exchanged sample was prepared by immersing the as-synthesized samples in dehydrated acetone for two days to remove the nonvolatile solvents, and the extract was decanted every 8 h and fresh acetone was replaced. The completely activated sample was obtained by heating the solvent-exchanged sample at room temperature for 6 h, 60°C for 6 h and then 120°C for 24h under a dynamic high vacuum. In the gas sorption measurement, ultra-high-purity grade were used throughout the adsorption experiments. Gas adsorption isotherms were obtained using a Belsorp volumetric adsorption instrument from BEL Japan Inc. using the volumetric technique. High pressure adsorption of H<sub>2</sub> (77K), CO<sub>2</sub>, C<sub>2</sub>H<sub>4</sub> and C<sub>2</sub>H<sub>6</sub> were measured by using a Belsorp-HP adsorption instrument at 273 and 298 K, respectively. The total high-pressure gas uptake was calculated by  $N_{\text{total}} = N_{\text{excess}} + \rho_{\text{bulk}} V_{\text{pore}}$ , where  $\rho_{\text{bulk}}$  is the density of compressed gas at the measured temperature and  $V_{\text{pore}}$  is the pore volume of the sample that was obtained from the N<sub>2</sub> isotherm at 77 K.

## Co-sorption measurements

Mixed gas adsorptions were carried out using a multicomponent gas adsorption apparatus, Belsorp-VC (MicrotracBEL Corp.). In this apparatus, the total adsorbed amount was calculated by a constant volume method, and the composition ratio of mixed gases was determined using an Agilent 490 Micro gas chromatographic system equipped with a thermal conductive detector. From these data, we calculated adsorbed amounts and partial pressures for each gas.

## Estimation of the isosteric heats of gas adsorption

A Virial-type expression comprising the temperature-independent parameters  $a_i$  and  $b_i$  was employed to calculate the enthalpies of adsorption for H<sub>2</sub> (at 77 and 87 K) on PCP-31 and PCP-32. In each case, the data were fitted using the equation:

$$\ln P = \ln N + 1/T \sum_{i=0}^m a_i N^i + \sum_{i=0}^n b_i N^i \quad (1)$$

Here,  $P$  is the pressure expressed in Torr,  $N$  is the amount adsorbed in mmol/g,  $T$  is the temperature in K,  $a_i$  and  $b_i$  are virial coefficients, and  $m$ ,  $n$  represent the number of coefficients required to adequately describe the isotherms ( $m$  and  $n$  were gradually increased until the contribution of extra added  $a$  and  $b$  coefficients was deemed to be statistically insignificant towards the overall fit, and the average value of the squared deviations from the experimental values was minimized).

$$Q_{st} = -R \sum_{i=0}^m a_i N^i \quad (2)$$

Here,  $Q_{st}$  is the coverage-dependent isosteric heat of adsorption and  $R$  is the universal gas constant.

From these results, the Henry's constant ( $K_H$ ) is calculated from where  $T$  is temperature.

$$K_H = \exp(-b_0) \exp(-a_0 / T) \quad (3)$$

The Henry's Law selectivity for gas component  $i$  over  $j$  at 273 and 298 K were calculated based on Eq. 4.

$$S_{ij} = K_{Hi} / K_{Hj} \quad (4)$$

## Estimation of the isosteric heats by temperature-dependent IR

The equations we used for the calculation of enthalpy and entropy<sup>2</sup>:

Langmuir isotherm:

$$Q = A / A_M = K(T)p / [1 + K(T)p] \quad (5)$$

where  $q$  is the coverage,  $A$  is the intensity of the IR adsorption band and  $A_M$  stands for the intensity corresponding to full coverage ( $q = 1$ ).  $K$  is adsorption equilibrium constant and  $p$  is the equilibrium pressure.

Vant't Hoff equation:

$$K(T) = \exp(-DH^\circ/RT) \exp(DS^\circ/R) \quad (6)$$

the combination of the vant't Hoff and Langmuir equations lead to the VTIR equation:

$$\ln[A/(A_M-A)p] = (-DH^0/RT)+(DS^0/R) \quad (7)$$

Plot the left-hand side of Equation (7) against the reciprocal of the temperature.

In addition, three assumptions, the Lambert-Beer law is valid; the adsorption process is an ideal Langmuir-type process; both  $\Delta H^0$  and  $\Delta S^0$  are temperature independent, should be taken into the considerations.

### **Isotherm models**

In order to evaluate the adsorption equilibrium selectivity and predict adsorption of gas mixture from pure component isotherms, the Henry's law linear isotherm equation and the Langmuir model were used to correlate the  $C_2H_2$ ,  $C_2H_4$ ,  $C_2H_6$  and  $CO_2$  adsorption on PCP-31 and PCP-32. The Henry's isotherm equation is

$$q = KP \quad (8)$$

where  $q$  is the adsorbed amount per unit weight of adsorbent ( $cm^3 g^{-1}$ ),  $P$  is the adsorbate gas pressure at equilibrium (torr), and  $K$  is the Henry's law constant ( $cm^3 g^{-1} torr^{-1}$ ).

The Langmuir isotherm is formulated as:

$$q = q_m b p / (1 + b p) \quad (9)$$

where  $q_m$  ( $cm^3 g^{-1}$ ) and  $b$  ( $torr^{-1}$ ) are the Langmuir isotherm equation parameters. The values of  $q_m$  and  $b$  were determined can be determined from the slope and intercept of a linear Langmuir plot of  $(1/q)$  versus  $(1/P)$ .

### **Adsorption equilibrium selectivity**

In order to evaluate the efficacy of an adsorbent for gas separation and purification such as removal/separation of  $C_2H_2/4$  from their  $CO_2$  mixtures by adsorption, it is necessary to know the adsorbent selectivity. The adsorption equilibrium selectivity ( $S$ ) between components 1 and 2 is defined as

$$S = (X_1/X_2) \times (Y_1/Y_2) = K_1/K_2 = (q_{m1}b_1) / (q_{m2}b_2) \quad (10)$$

where component 1 is the stronger adsorbate and 2 is the weaker adsorbate.  $X_1$  and  $X_2$  are the molar fractions of components 1 and 2 on the adsorbent surface (or in the adsorbed phase),  $Y_1$  and  $Y_2$  are the molar fractions of components 1 and 2 in the gas phase.  $q_{m1}$  and  $q_{m2}$  and  $b_1$  and  $b_2$  are the Langmuir equation constants for components 1 and 2.  $K_1$  and  $K_2$  are the Henry's constants for components 1 and 2. The Henry's constants and the equilibrium selectivity for different gases on the two PCPs are listed in Table 1.

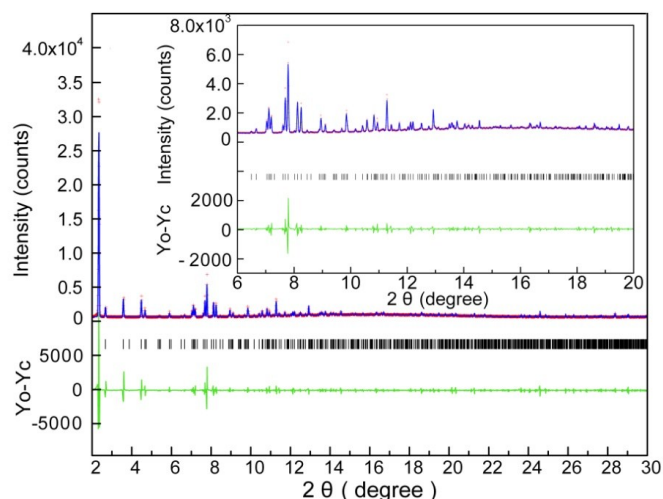

**Figure S1.** The results of Le Bail analysis for the PXRD of PCP-31. The wavelength of an incident X-ray is 1.0 Å. Refined parameters and reliability factors are as follows:  $a = 42.130(27)$  Å,  $c = 31.958(27)$  Å,  $R_p = 0.0445$  and  $R_{wp} = 0.0886$ .

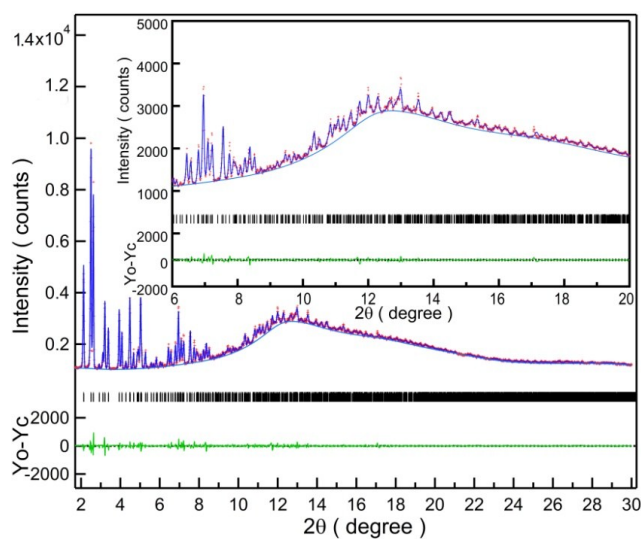

**Figure S2.** The result of Le Bail analysis for the PXRD of PCP-32. The wavelength of an incident X-ray is 1.0 Å. Refined parameters and reliability factors are as follows:  $a = 36.856(3)$  Å,  $b = 39.124(3)$  Å,  $c = 43.598(3)$  Å,  $R_p = 0.01811$  and  $R_{wp} = 0.03067$ .

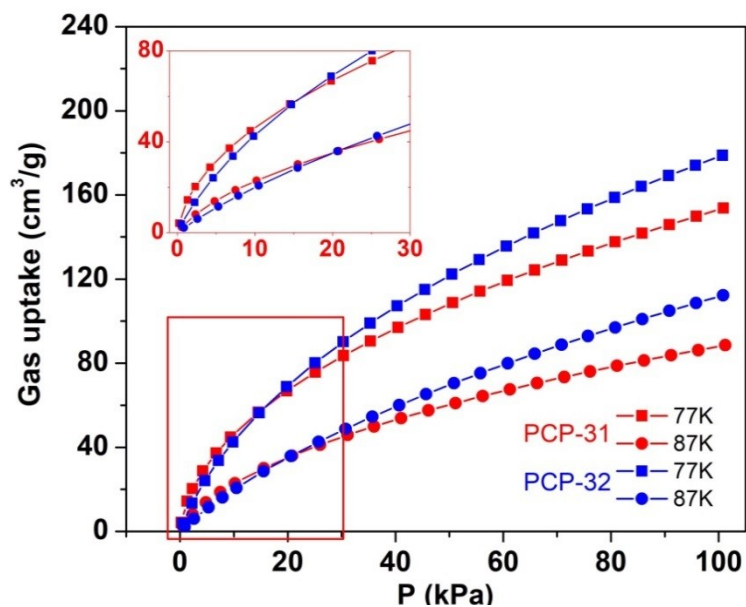

**Figure S3.** Hydrogen uptakes of PCP-31 and PCP-32 at 77 and 87K. Inset is the gas uptakes before 30 kPa.

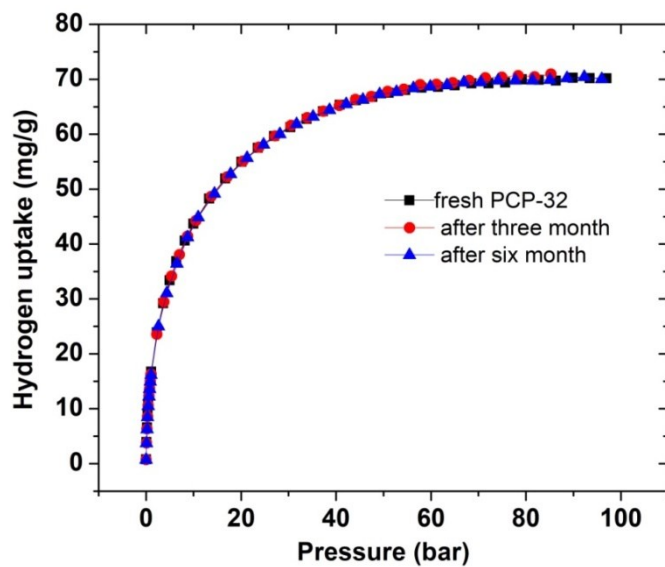

**Figure S4.** Repeated H<sub>2</sub> adsorption of PCP-32 at 77K. The sample was stored in dry environment.

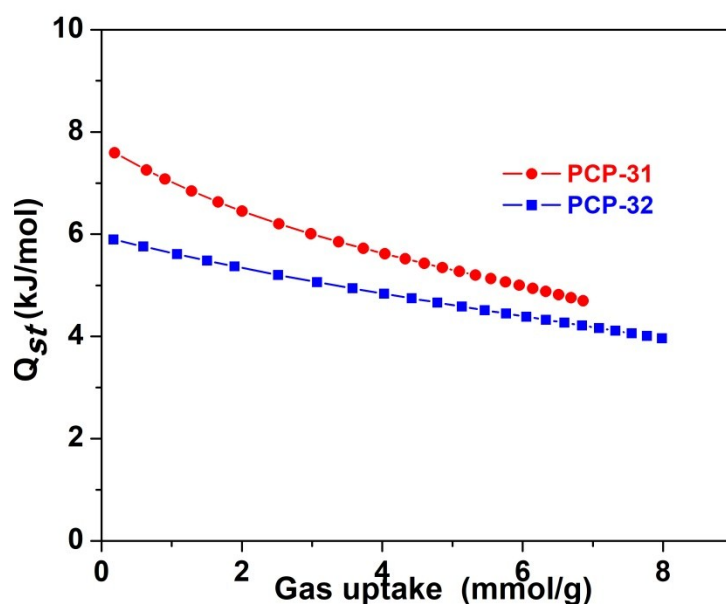

Figure S5. Calculated H<sub>2</sub> adsorption heat of PCP-31 and PCP-32.

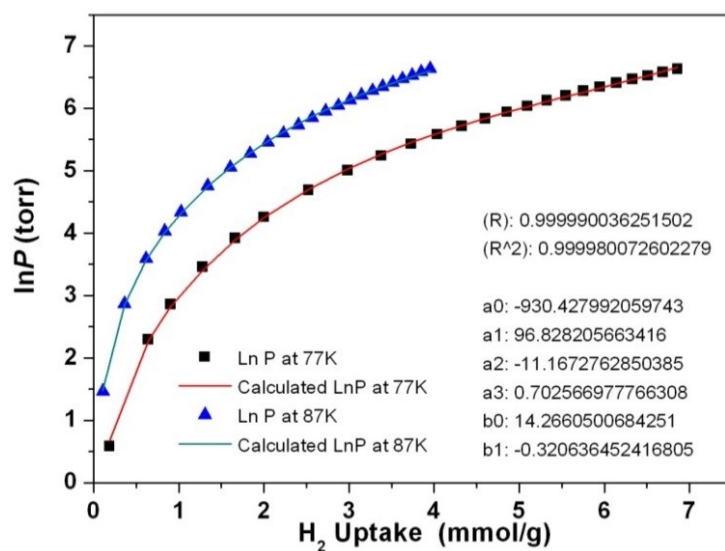

Figure S6. The calculated virial equation isotherms fit to the experimental H<sub>2</sub> data of PCP-31.

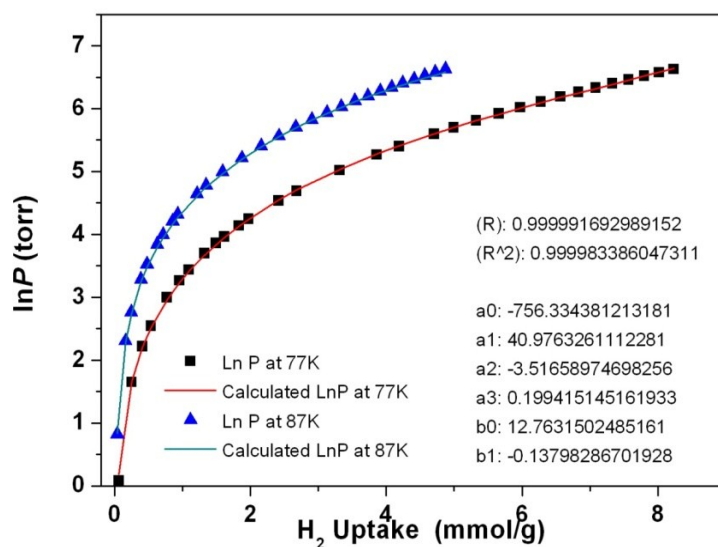

**Figure S7.** The calculated virial equation isotherms fit to the experimental  $H_2$  data of PCP-32.

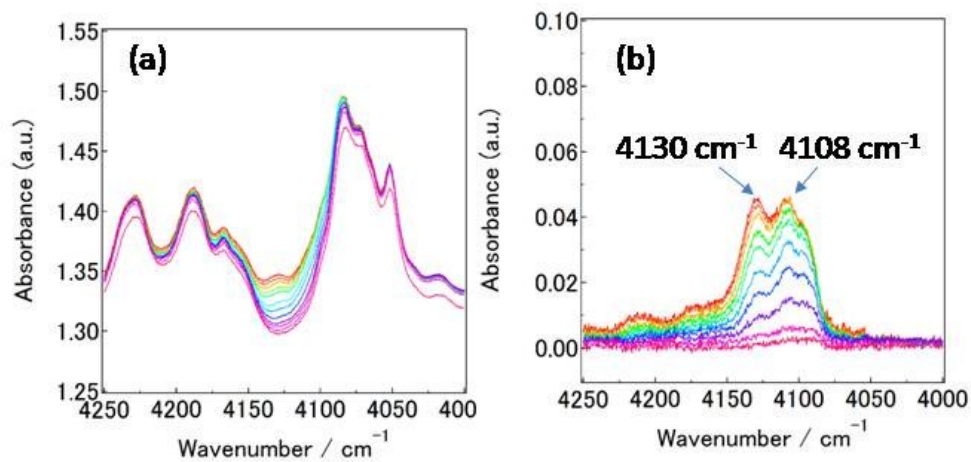

**Figure S8.** Pressure-dependent IR (0-5 bar) for  $H_2$  binding within PCP-31 at 102 K (a, raw; b differential), the spectra represents a resolution of  $0.125\text{ cm}^{-1}$  with an average collecting of 128 times. The max pressure is 5 bar.



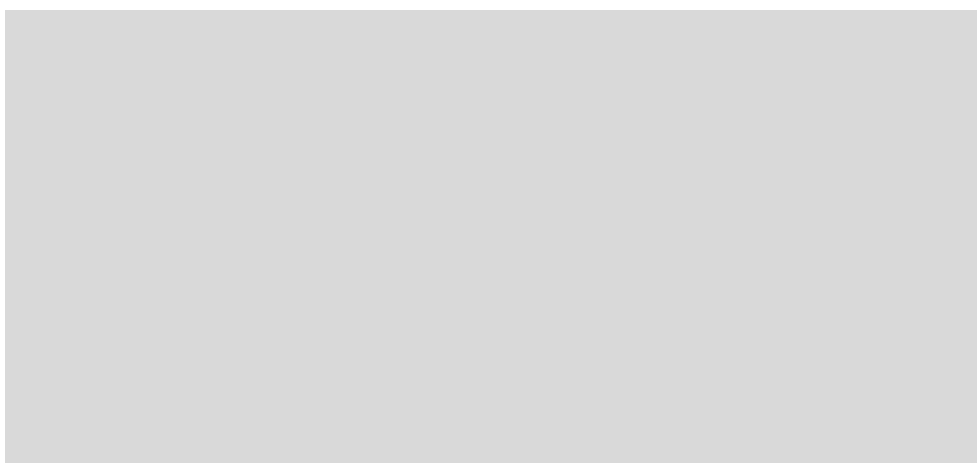

**Figure S9.** Temperature-dependent IR (102-172 K) for H<sub>2</sub> binding within PCP-31 at 1 bar (a, raw; b differential), the spectra represents a resolution of 0.125 cm<sup>-1</sup> with an average collecting of 128 times.

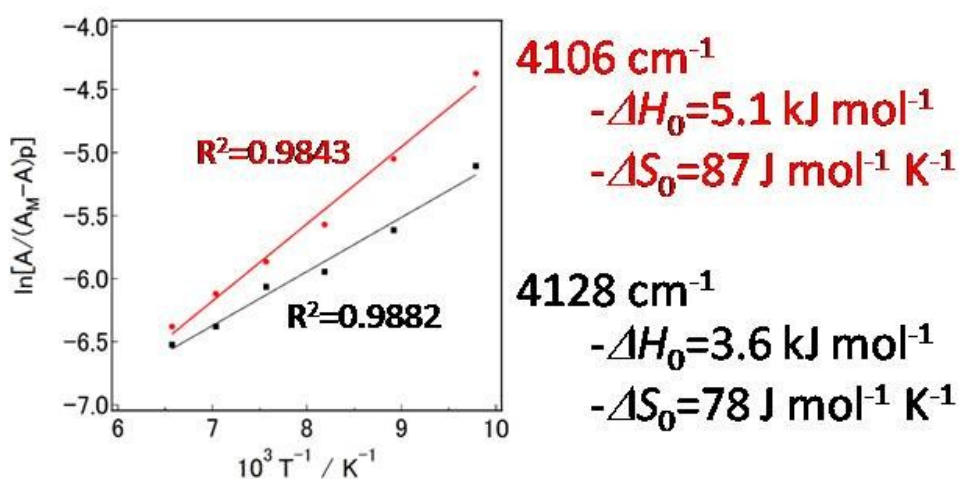

**Figure S10.** An Van't Hoff plot derived from the integral of absorption band corresponding to the binding site for PCP-31. The solid lines represent the line of best fit to each set of data.

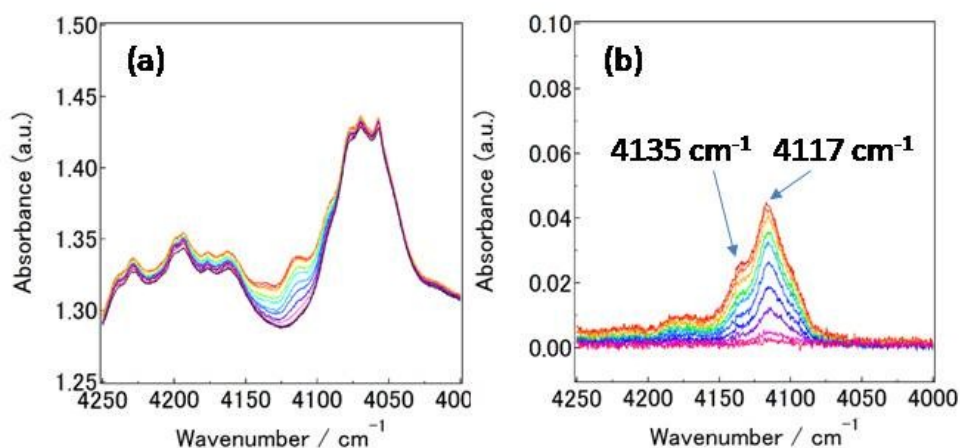

**Figure S11.** Pressure-dependent IR (0-5 bar) for H<sub>2</sub> binding within PCP-32 at 102 K (a, raw; b differential), the spectra represents a resolution of 0.125 cm<sup>-1</sup> with an average collecting of 128 times. The max pressure is 5 bar.

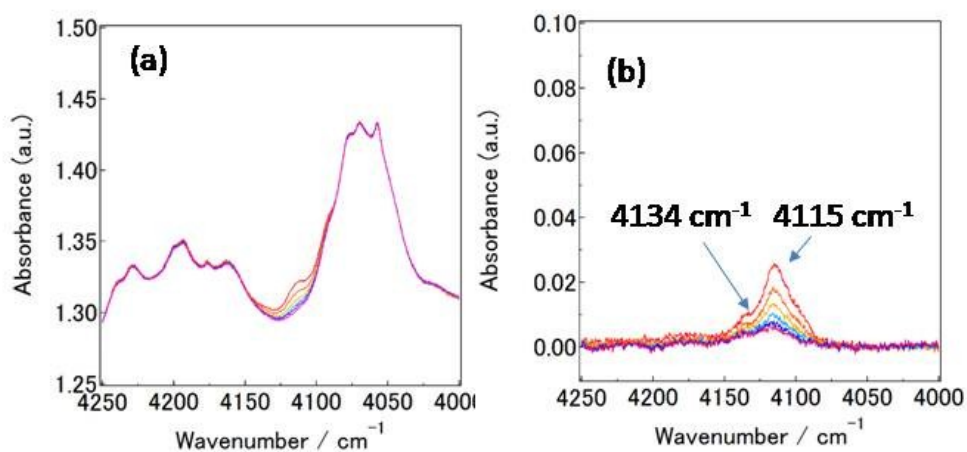

**Figure S12.** Temperature-dependent IR (102-172 K) for H<sub>2</sub> binding within PCP-32 at 1 bar (a, raw; b differential), the spectra represents a resolution of 0.125 cm<sup>-1</sup> with an average collecting of 128 times.

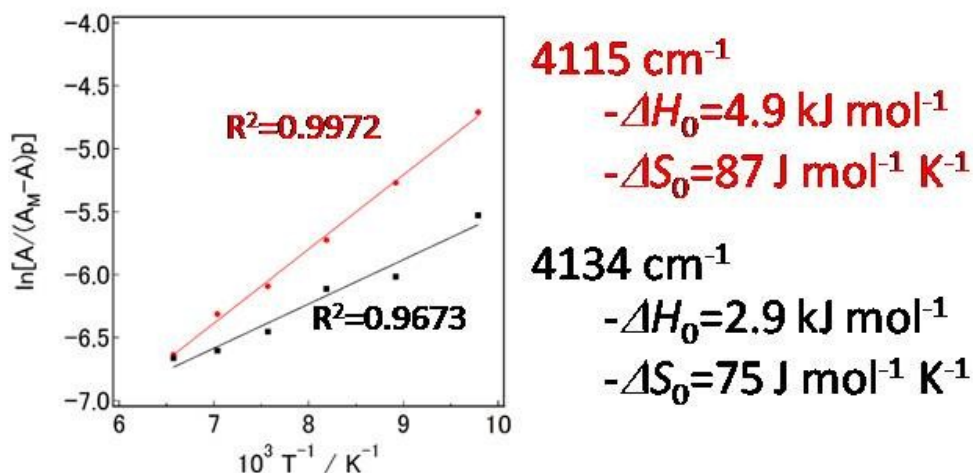

**Figure S13.** An Van't Hoff plot derived from the integral of absorption band corresponding to the binding site for PCP-32. The solid lines represent the line of best fit to each set of data.

**Table S1.** List of physical parameters for the adsorbate molecules.

|                      | C <sub>2</sub> H <sub>2</sub> | C <sub>2</sub> H <sub>4</sub> | C <sub>2</sub> H <sub>6</sub> | CO <sub>2</sub> |
|----------------------|-------------------------------|-------------------------------|-------------------------------|-----------------|
| Kinetic Diameter / Å | 3.3                           | 3.9                           | 3.9                           | 3.3             |
| Boiling Point / K    | 189                           | 170                           | 184                           | 195             |

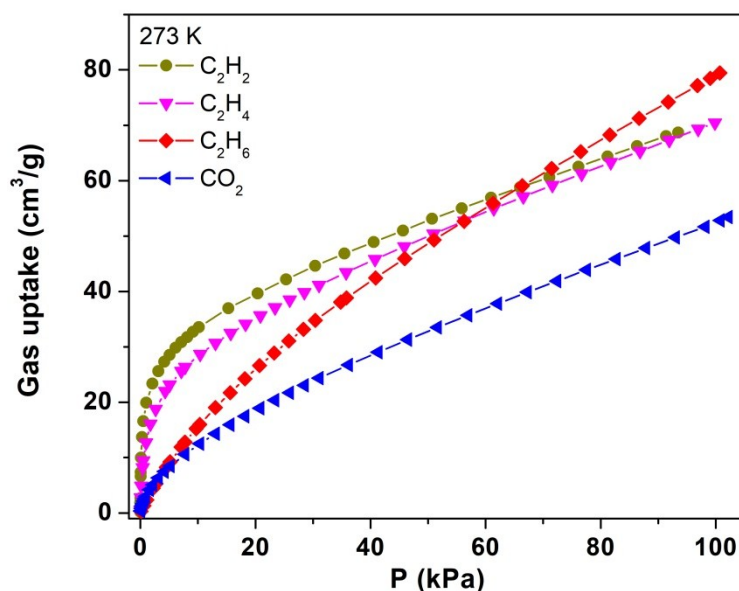

**Figure S14.** C<sub>2</sub>-hydrocarbons and CO<sub>2</sub> gas adsorption at 273 K in PCP-31.

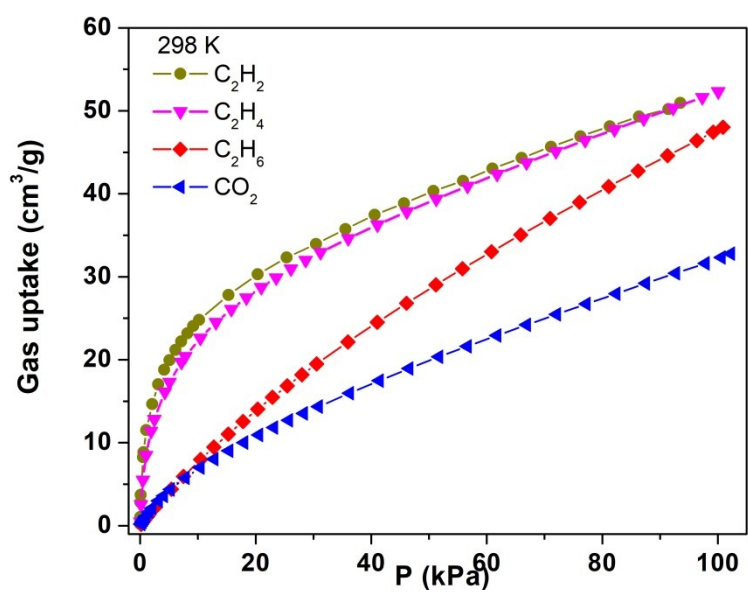

Figure S15. C2-hydrocarbons and CO<sub>2</sub> gas adsorption at 298 K in PCP-31.

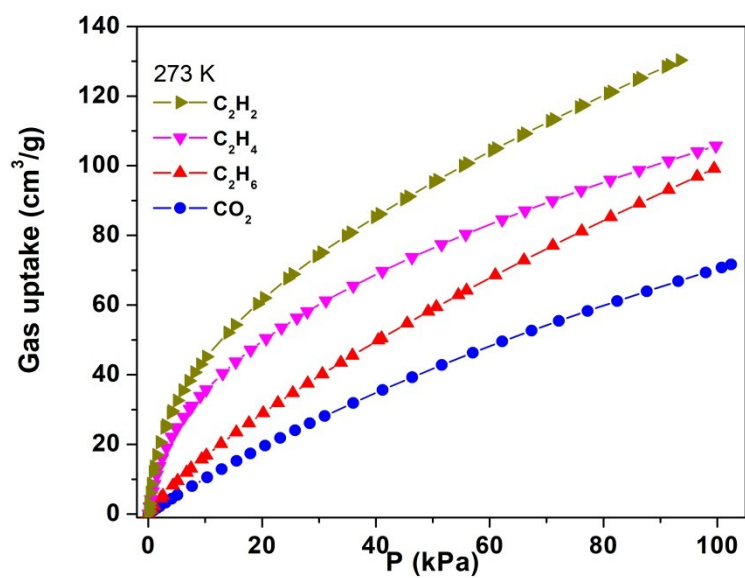

Figure S16. C2-hydrocarbons and CO<sub>2</sub> gas adsorption at 273 K in PCP-32.

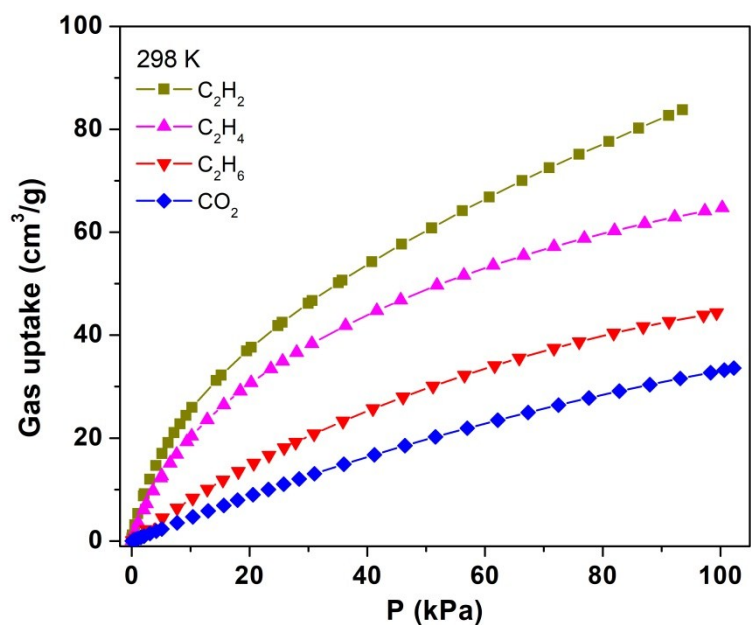

Figure S17. C<sub>2</sub>-hydrocarbons and CO<sub>2</sub> gas adsorption at 298 K in PCP-32.

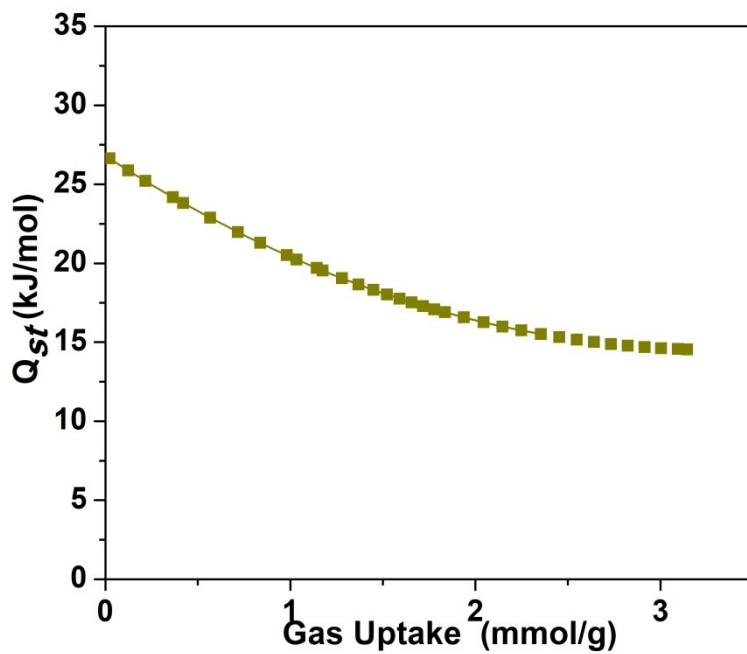

Figure S18. Calculated C<sub>2</sub>H<sub>4</sub> adsorption heat of PCP-31.

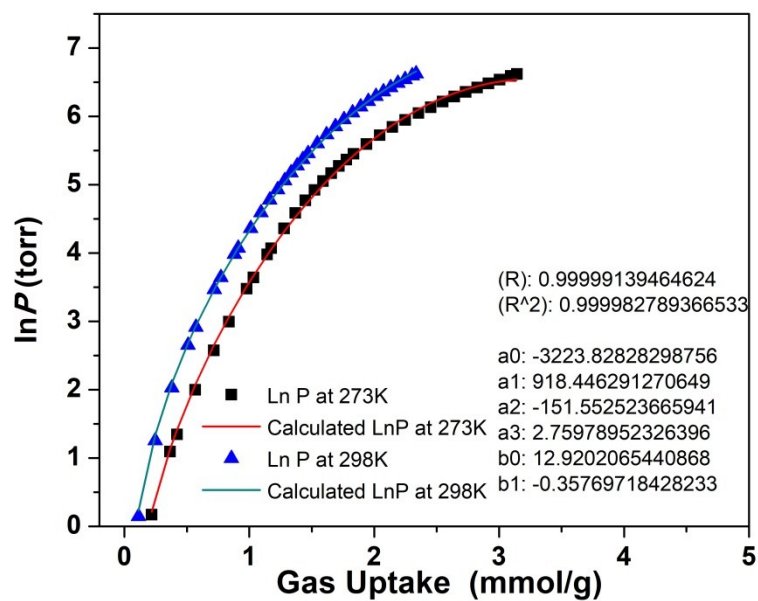

**Figure S19.** The calculated virial equation isotherms fit to the experimental C<sub>2</sub>H<sub>4</sub> data of PCP-31.

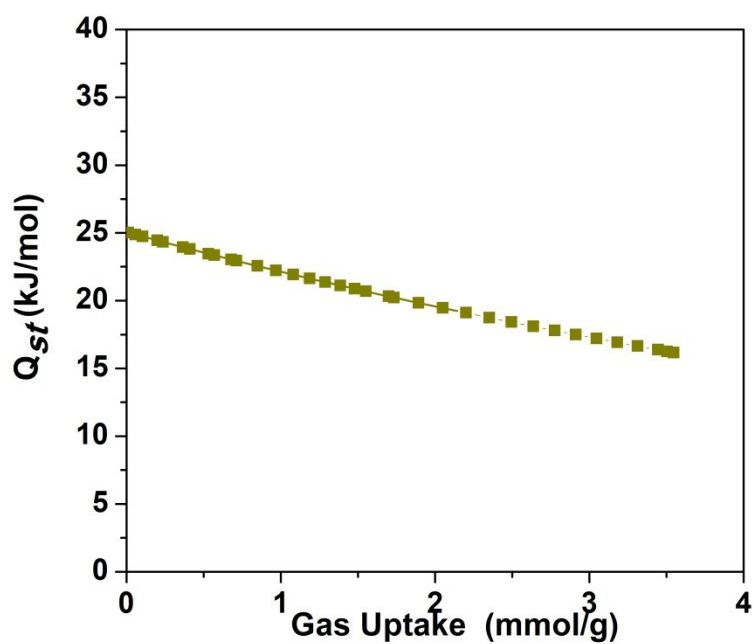

**Figure S20.** Calculated C<sub>2</sub>H<sub>6</sub> adsorption heat of PCP-31.

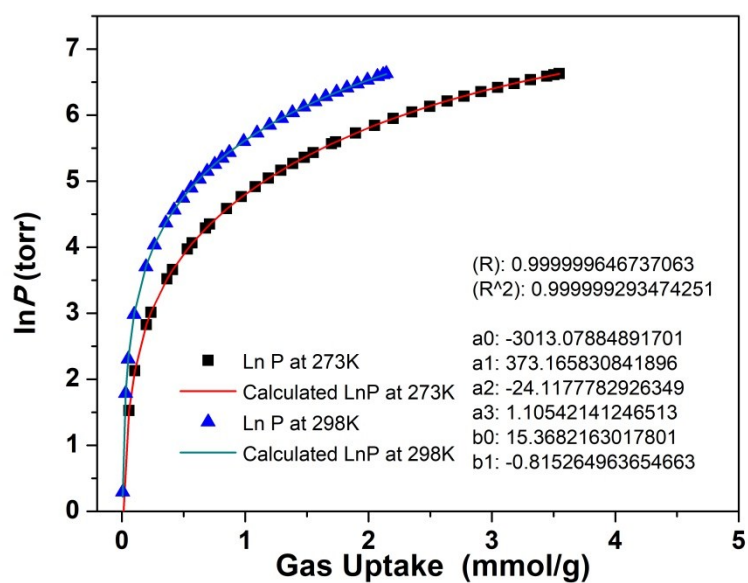

**Figure S21.** The calculated virial equation isotherms fit to the experimental  $C_2H_6$  data of PCP-31.

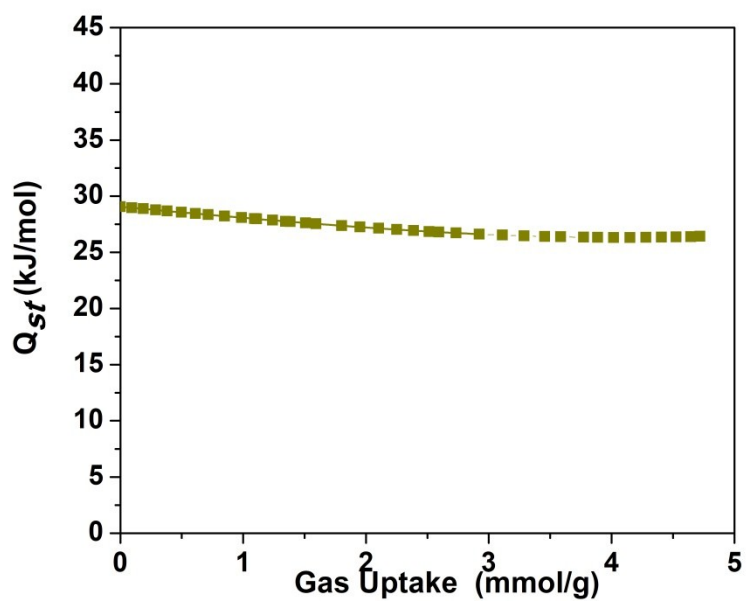

**Figure S22.** Calculated  $C_2H_4$  adsorption heat of PCP-32.

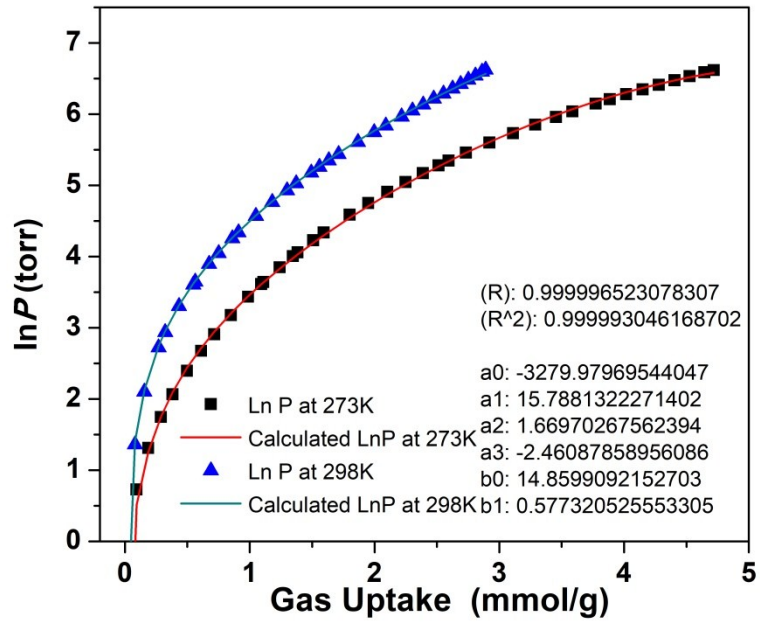

**Figure S23.** The calculated virial equation isotherms fit to the experimental C<sub>2</sub>H<sub>4</sub> data of PCP-32.

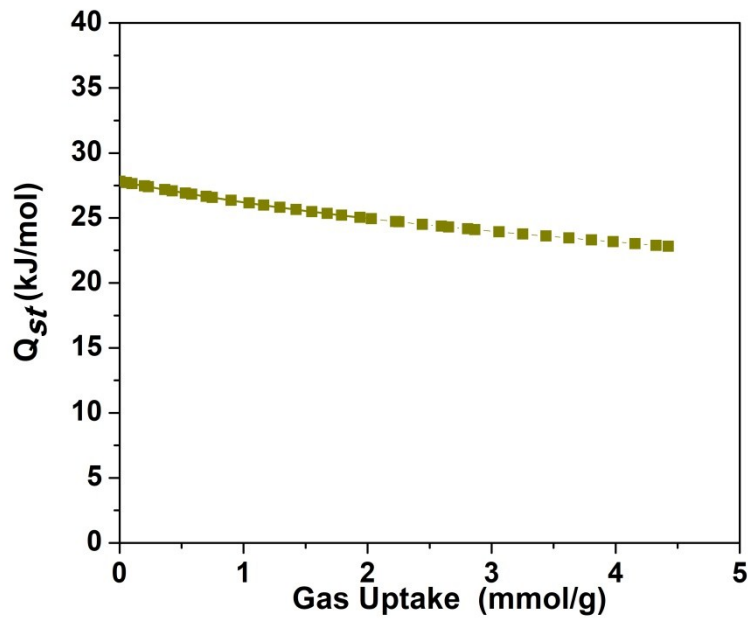

**Figure S24.** Calculated C<sub>2</sub>H<sub>6</sub> adsorption heat of PCP-32.



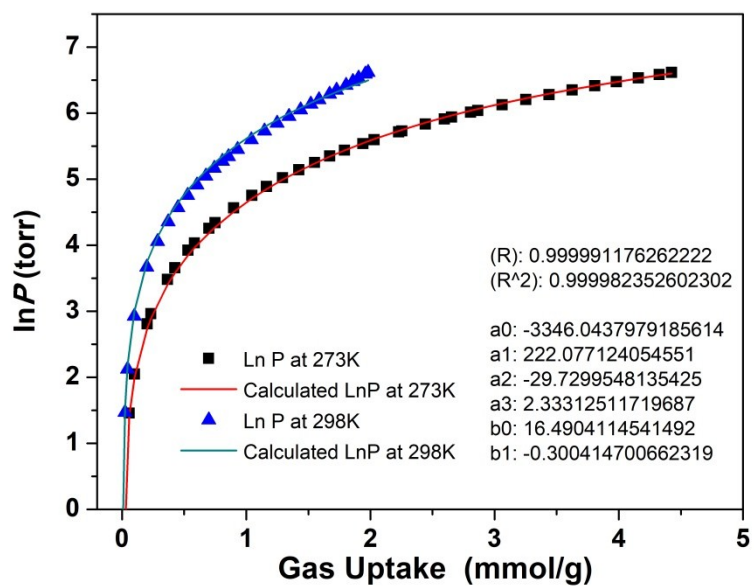

**Figure S25.** The calculated virial equation isotherms fit to the experimental C<sub>2</sub>H<sub>6</sub> data of PCP-32.
